1 *Original Research Manuscript*

2  
3 **The Psychological Impact of Torture and**  
4 **State Repression in Türkiye between 2015 and 2018:**  
5 **Reports from Turkish Refugees Seeking Asylum in Germany**

6  
7  
8 Estella Alejandra Tambini Stollwerck<sup>1\*</sup>, Ilkem Sarikaya<sup>2</sup>,  
9 Kathrin Yen<sup>2</sup>, Hans-Christoph Friederich<sup>1</sup> & Christoph Nikendei<sup>1</sup>

10  
11 Affiliation

12 <sup>1</sup> Centre for Psychosocial Medicine, Department for General Internal Medicine and  
13 Psychosomatics, Heidelberg University Hospital, Heidelberg, Germany

14 <sup>2</sup> Institute of Forensic and Traffic Medicine, Heidelberg University Hospital, Heidelberg,  
15 Germany

16  
17  
18  
19  
20 \*Corresponding Author: [estella.tambinistollwerck@med.uni-heidelberg.de](mailto:estella.tambinistollwerck@med.uni-heidelberg.de) (ETS)

## 22 **Abstract**

23 Torture seeks to undermine not only the physical and emotional well-being of an individual but  
24 to damage the coherence of entire communities. Thus, torture and state repression are used to  
25 weaken entire subpopulations. After the failed coup d'état in Türkiye in 2016 and during the  
26 subsequently following state of emergency that lasted until 2018, allegations of torture and  
27 other degrading treatment in Türkiye spread widely. Since then, the number of asylum-seekers  
28 in Germany has risen considerably.

29 This paper analyses the reports of twenty Turkish citizens that fled to Germany to seek asylum  
30 in the aftermath of the events. In semi-structured interviews held in Turkish, we assessed the  
31 experiences of torture and state repression, psychological consequences, and the current well-  
32 being and living situation.

33 All interviewees described illicit experiences with violence from state authorities and  
34 government supporters, especially while under arrest. Though the methods varied, there was a  
35 constant pattern of imbalance of power. The psychological impact of these methods were  
36 present after relocation in Germany and included signs of PTSD, anxiety disorders, and major  
37 depression.

38 The reports of torture, state repression, and their psychological impact emphasise the  
39 importance for policy makers to address the prevention of human rights violations and support  
40 the needs of survivors.

41

42 Keywords: Torture, State Repression, Violence, Mental Health, Türkiye, Refugees; Istanbul  
43 Protocol

## 44 **Introduction**

45 Torture is a dehumanizing crime that seeks to undermine an individual’s personality (1). The  
46 Convention against Torture and Other Cruel, Inhuman or Degrading Treatment or Punishment  
47 (UNCAT), Art. 1, defines torture as “any act by which severe pain or suffering, whether  
48 physical or mental, is intentionally inflicted on a person for such purposes as obtaining from  
49 him or a third person information or a confession, punishing him for an act he or a third person  
50 has committed (...) when such pain or suffering is inflicted by or at the instigation of (...) a  
51 public official” (2). State repression is understood as the use of fear tactics and the restriction  
52 of civil liberties of political opponents by government authorities, the political party in power,  
53 and its supporters (3). As of June 2023, the UNCAT has 173 state parties, including Türkiye  
54 (2).

55 Nevertheless, torture is still practiced in many countries today, having major social and  
56 psychological consequences for their societies. Among others, trauma sequelae disorders, such  
57 as post traumatic distress, major depression or anxiety disorders, are prevalent in persons that  
58 were exposed to state repression and torture (1,4,5). Survivors often not only report emotional  
59 symptoms but also sleep disturbances, chronic pain, headaches, and difficulty in concentrating  
60 (5,6). Accordingly, in a comparison between tortured and non-tortured activists, torture raised  
61 negative psychological effects independent of other stressors in a politically repressive  
62 environment (7).

63 Türkiye is one of the European countries that support UNCAT but have allegedly practiced  
64 torture in the last decade (8–11). Torture and other ill-treatment by the Turkish state towards  
65 political dissidents has been documented by UN Subcommittee on prevention of torture in 2017  
66 and the Council of Europe anti-torture Committee (8,9,11,12). Meanwhile, the institutionalised  
67 use of repression and torture, especially against Kurds and left-wing citizens, was carried out  
68 long before (4,13–15). Allegations against gendered political violence, as well as rape and

69 torture by police officers in custody in Türkiye are common (16,17). State repression against  
70 ethnic minorities, particularly its large Kurdish population, has led to widespread claims of  
71 human rights abuses and a large number of political refugees claiming to have suffered torture  
72 (4,17). Furthermore, the criminalisation of the petition signed by the so called “Academics of  
73 Peace” was seen as a massive suppression of academic freedom (18–20). In 2015, peace talks  
74 with the Kurdish minority ended and subsequently led to the deterioration of the relationship  
75 with the government. The overall security situation worsened as Türkiye was shaken by various  
76 suicide attacks in the following years claimed by the Daesh, among them a detonation of  
77 explosives at the “Labor, Peace and Democracy Rally” that took place on 10 October 2015 in  
78 Ankara (21). At this occasion alone, more than 100 civilians were killed and over 500 people  
79 were injured. On 15 July 2016, an unsuccessful coup attempt by the military led to the  
80 imprisonment of intellectuals, purges in the Turkish military and mass dismissals in the public  
81 sector (18,20,22,23). Subsequently, the government imposed a state of emergency that lasted  
82 for two years (18). Entailed by these developments, Türkiye is one of ten nationalities with the  
83 highest rate of asylum applications in Germany since 2017. From 2017 until 2019 alone,  
84 Germany registered around 29.000 applications for asylum from Turkish citizens, making it the  
85 third biggest group of new asylum seekers in 2019 (24).

86 To our knowledge, no other study so far has analysed the psychological consequences of  
87 vulnerable groups within Türkiye that have fled the country in the aftermath of the end of peace  
88 talks between the Turkish government and the Kurds, the failed coup d'état, and the prolonged  
89 state of emergency. Therefore, the presented study aimed at a) assessing personal experiences  
90 of torture and state terror in Türkiye between 2015-2018 and b) the evaluation of the mental  
91 health burden that arose due to these experiences.

92

## 93 **Methods**

## 94 **Study design and ethical considerations**

95 The study took place on the premises of the Heidelberg Institute of Forensic and Traffic  
96 Medicine in the first year of the COVID-19 pandemic. Given the exploratory character of our  
97 research questions, we conducted a qualitative study with semi-structured interviews with  
98 Turkish asylum seekers and refugees on their experiences in Türkiye between 2015-2018 and  
99 the subsequent impact on previous and current mental health.

100 This study followed the ethical standards laid down in the 1964 Declaration of Helsinki about  
101 confidentiality, informed consent, and a guided research protocol. The interviews followed the  
102 Istanbul Principles, the recommendations of the Istanbul Protocol (1) for the documentation of  
103 torture. Safety and confidentiality were established by conducting private interviews in a  
104 separated room. The study was approved by the Ethics Commission of the Medical Faculty at  
105 Heidelberg University (S170/2020; 30.03.2020). All participants were fully informed about the  
106 aims and methods of the study and completed an informed consent form prior to participation.  
107 There was no reimbursement for participation, but travel expenses were covered.

108

## 109 **Participants and Procedure**

110 Our targeted group were asylum-seekers from Türkiye that fulfilled the following inclusion  
111 criteria: Age of 18 or older and residence in Türkiye for at least one year during the period of  
112 interest from 24 July 2015 until 18 July 2018. We searched for participants with messages on  
113 notice boards, via non-governmental organisations, and personal contact to the local Turkish  
114 community from 02 May 2020 until 15 October 2020. The researchers handed out information  
115 and the Harvard Trauma Questionnaire (HTQ) upon request (25). Eligible participants filled  
116 out the HTQ to assess an indication of experiences of torture and state repression between July  
117 2015 until the official end of the state of emergency in July 2018. If the individual was willing  
118 to participate in the study and fulfilled all requirements, they contacted the second author (I.S.)

119 and arranged a meeting on the premises of the Institute for Forensic and Traffic Medicine of  
120 the University of Heidelberg. We included all Turkish refugees that answered to our posting  
121 and expressed to have experienced torture in their home country.

122 Upon arrival, all participants signed a form that stated they had no symptoms of Covid-19 and  
123 the medical researcher (I.S.) measured their temperature. Thereafter, participants answered  
124 questions concerning sociodemographic data, such as age, nationality, religion, ethnicity, and  
125 educational level. All interviews were audio recorded and conducted in Turkish by the first  
126 authors (E.T. and I.S.), facilitated by German – Turkish interpretation in both directions by the  
127 second author (I.S.) who also clarified cultural queries if necessary. The Appendix offers the  
128 original version of all quotes.

129

## 130 **Data analysis**

131 To obtain descriptive statistics, the analysis of demographic variables and baseline  
132 characteristics was managed with Excel, program version 16.75.2 (26). All interviews had a  
133 length of one to two hours, including the time needed for interpretation Turkish - German. They  
134 were transcribed verbatim in Turkish following predefined transcription rules and translated  
135 into German by the second author (I.S.). We used the written translation of the original Turkish  
136 text parts instead of the spontaneous translation into German on the recording to stay as close  
137 as possible to the original statements. The qualitative data was analysed with MAXQDA 2022,  
138 Release 22.2.0 (27), led by the principles of qualitative content analysis following Mayring  
139 (28). The first author developed a coding framework combining inductive and deductive  
140 themes, guided by a review of relevant literature on torture. Inductive codes were derived  
141 directly from the narratives. Each statement, either a single sentence or content related  
142 sentences, was assigned to our key research topics as a content analytic unit of analysis. Some  
143 phrases referred to more than one category, so double categorisation was possible. Each single

144 or multiple content-bearing sentence was seen as a basic unit and was coded by a term that  
145 formed a relevant category. Afterwards, the categories were summarised into main themes until  
146 a final number of relevant main themes for all participants was found (commonly termed  
147 content saturation). If necessary, the main themes and categories were adjusted to form a  
148 common category (28).

149

## 150 **Results**

151 A total of  $N = 25$  participants filled out the HTQ, of which five participants declined  
152 participation due to safety concerns and fear of political consequences.  $N = 20$  participants took  
153 part in the study. All but one participant, whose interview was conducted in German, provided  
154 their answers in Turkish. Table 1 shows the sample characteristics of all study participants.  
155 Most interviewees arrived in Germany between 2017-2019 and several were granted asylum  
156 for three years, but some were still waiting for a decision by the authorities.

158 **Table 1. Participant Demographic Information,  $N = 20$ .**

| <b>Gender</b>                    | <b>Percentage</b> |
|----------------------------------|-------------------|
| female                           | 60%               |
| male                             | 40%               |
| divers                           | 0%                |
| <b>Age</b>                       |                   |
| 20-24                            | 5%                |
| 25-29                            | 25%               |
| 30-34                            | 25%               |
| 35-39                            | 25%               |
| 40-44                            | 10%               |
| 45-50                            | 10%               |
| <b>Religion and Ethnic Group</b> |                   |
| Alevis                           | 50%               |
| Atheism                          | 5%                |
| Islam                            | 10%               |
| Other                            | 35%               |
| Kurdish                          | 70%               |

159 Note. The order is based on the alphabetical or numerical order except for the category of Gender.

160

161 Table 2 details the Key Themes and Codes that we derived from the interviews. We identified

162 1308 statements that were coded and summarised into categories. Finally, 14 categories within

163 three main themes were derived and included in this publication.



165 **Table 2. Key Themes and Codes.**

| <b>Main themes</b>                           | <b>Codes</b>                                                                                                                                                                                                                                                                                  |
|----------------------------------------------|-----------------------------------------------------------------------------------------------------------------------------------------------------------------------------------------------------------------------------------------------------------------------------------------------|
| <b>Experience of violence (8 categories)</b> | Torture<br>Arbitrariness and state violence<br>Police house searches<br>Violence at demonstrations<br>Detention and police custody, charges, and prison conditions<br>Violence in the context of conflicts in Kurdish areas<br>Violence of civil government supporters<br>Sexualised violence |
| <b>Psychological consequences (3)</b>        | Acute response<br>Emotional reaction: Fear and anxiety; Anger and impulsivity; Powerlessness and hopelessness; Courage and strength<br>Long-term consequences: Hypervigilance and lack of trust; Isolation, loneliness, and silence; Suppressing feelings and forgetting                      |
| <b>Current Situation (3)</b>                 | Political conviction and religious belief<br>Subjective well-being, work, and social activities<br>Plans for the future                                                                                                                                                                       |

166

167

168 **Experience of violence**

169 The interviewees described their experiences with different forms of state repression and torture

170 by the use of force, threats, and sexual assault. Table 3 indicates the frequencies for different

171 forms of violence that participants marked in a checklist.

172

174 **Table 3. Types of violence reported by survivors of torture and state repression,  $N = 20$ .**

| Type of violence                                               | Number of participants |
|----------------------------------------------------------------|------------------------|
| 1. Solitary confinement                                        | 13                     |
| 2. Sleep deprivation                                           | 15                     |
| 3. Stress positions                                            | 14                     |
| 4. Electric shocks                                             | 4                      |
| 5. Falaqa                                                      | 2                      |
| 6. Palastanian Hanging                                         | 0                      |
| 7. Prolonged wearing of a blindfold or handcuffs               | 15                     |
| 8. Extreme hunger or thirst                                    | 12                     |
| 9. Exposure to extreme brightness or total darkness            | 15                     |
| 10. Exposure to freezing water or forced submersion            | 4                      |
| 11. Forced injection of drugs                                  | 1                      |
| 12. Threats with dangerous animals                             | 0                      |
| 13. Mock executions                                            | 7                      |
| 14. Persecution perceived as life-threatening                  | 17                     |
| 15. Repeated threats of violence                               | 16                     |
| 16. Naked and invasive body searches                           | 16                     |
| 17. Sexual assaults and threats                                |                        |
| a. Touched on genitals                                         | 11                     |
| b. Forced to undress                                           | 14                     |
| c. ‘Virginity checks’                                          | 1                      |
| d. Rape with objects                                           | 2                      |
| 18. Were fellow inmates forced to commit violent acts?         | 6                      |
| 19. Were you forced to commit acts of violence against others? | 1                      |
| 20. Did you feel dehumanised or degraded by the state?         | 16                     |

176 *Torture* (51 quotes): All interviewees described some form of torture, either psychologically or  
177 physically. Some witnessed physical violence towards friends and family in prison or in public  
178 spaces, others experienced it themselves. Eleven out of twenty interviewees described torture  
179 in detention or after abduction with tremendous human rights violations. Some provided  
180 detailed depictions of torture with highly specialised means and knowledge used to obtain  
181 confessions or to stop people from being politically active. Some mentioned isolated cells that  
182 had been equipped with sound insulation, light that shone constantly 24/7, and meals being  
183 served at randomly varying times to affect the sense of time. Two participants reported that,  
184 occasionally, the guards played loud military music all day long and forced them to stay awake.  
185 One participant described being kept in an underground room for hours, where the ground  
186 emitted electric shocks and burned his feet. He experienced induced choking when a police  
187 officer knelt on his chest and larynx while pressing a wet towel on his nose. Some described  
188 the constant fear of being followed or under surveillance in a dangerous political environment  
189 as torture. The bombing at a peace rally in Ankara in 2015 was considered as torture, as several  
190 participants suspected that the state authority knew about the attacks without intervening.

191 *As I said, one of the methods of torture is, for example, the national anthem (...). But there they play it, play*  
192 *it again, play it again, play it again, play an anthem, then the army march [Mehter Marşı], and you go crazy.*  
193 *And that loud noise, they are trying to drive you crazy, they are brainwashing you. (TN 21, Pos. 35)*

194  
195 *For 93 days, what I experienced and heard, the questions I was asked, the attitudes of the people who asked*  
196 *me questions, their professional experience, the technological possibilities they had access to, I was taken to*  
197 *a torture centre where each of the scientific torture methods were applied, not a gang, not three or five punks,*  
198 *but an organised torture centre with changing shifts. I already had in my mind "maybe I will be killed"... (TN*  
199 *21, Pos. 36)*

200  
201 *Arbitrariness and state violence* (57 quotes): Interviewees described various forms of police  
202 assaults. Nearly all participants described physical and psychological violence as threats,  
203 insults, or punches, when they were forced to provide fingerprints in state prisons. As a formal  
204 requirement, interviewees described a medical examination before and after their custody.

205 Although this procedure was formally followed in most cases, it often resulted in the injuries at  
206 hand being intentionally ignored. Only one participant stated that the doctor resisted the police  
207 and declined to write a report. In public spaces or online, some stated they were threatened and  
208 told to stop their political activism. Some learned that their telephone conversations had been  
209 tapped for months to years. Two interviewees reported they had been kidnapped by special  
210 forces and were interrogated by them. Several participants said specifically that, in order to  
211 cause fear, police officials described the violence they were about to inflict upon them. Others  
212 felt that the level of repression rose after the failed coup attempt.

213 *The police entered the university; we did some small political work at that time... They threatened me,*  
214 *saying "your father and brother are imprisoned, we will arrest you, too"... (TN 12, Pos. 19)*

215  
216 *They beat you and frightened you there too, but not as much as the second time, the second time, in October,*  
217 *when there was an attack on Rojova, Türkiye 's attack on Rojova, they said "we will take you to the border,*  
218 *we will shoot you in the head, we will say that we killed you because you are a terrorist". They said they*  
219 *would do that now. (TN 16, Pos. 61)*

220  
221 *Police house searches (15 quotes):* Many interviewees described police house searches as  
222 unjustified and as a serious invasion of privacy. Some said that police officials had entered the  
223 house by smashing the door, put the residents on the floor, and stomping them with their feet.  
224 For several participants, this dominant behaviour caused high levels of psychological stress and  
225 a feeling of constant insecurity. Some interviewees stated that police officers threatened family  
226 members and caused an insecure environment, which they felt had a high impact on neighbours  
227 who were intimidated and afraid to approach the family afterwards. One threw away copies of  
228 books and newspapers in the night of the coup attempt and thereafter in fear of oppression.

229 *At first, we were subjected to the screams of our friends in the next room as a result of the tortures inflicted*  
230 *on them. Psychological torture such as "We will come to you soon, we will sweat on you, then we will make*  
231 *you scream the same screams". I can already say that apart from the beatings, punches, kicks and hair*  
232 *pulling. Then psychological torture such as showing us the bloodied bodies of our friends in the next room*  
233 *and saying "take a good look at this, you will never see it again" and making us fear that he would be killed.*  
234 *(TN 2, Pos. 45)*

235

236 *In the incident in Istanbul, for example, after the coup, our house was raided many times, our doors were*  
237 *broken down in the morning, inside, I mean, very arbitrary treatment, they scattered everything, the books I*  
238 *read were officially printed books, books that were not forbidden but were forbidden according to them. (TN*  
239 *5, Pos. 5)*

240  
241 *They took turns passing my mum, swearing at her. My mum still doesn't say the swear words. She just says*  
242 *"they told me very bad things about you". I don't know what they said. Then they got in line and spat in my*  
243 *mum's face. (TN 10, Pos. 93-94)*

244  
245 *Violence at demonstrations (28 quotes) and at the peace rally in Ankara 2015 (22 quotes):*

246 Interviewees described several occasions when they experienced oppression by the state police  
247 at peaceful demonstrations, others observed violence between protestors and state officials. The  
248 allegations of various participants in the context of the peace rally in Ankara 2015 concerned  
249 delays and failure to provide aid in the aftermath. Several interviewees accused the secret  
250 service of knowing about the suicide bombings without publishing a warning to the population,  
251 pointing out that the police were absent during the beginning of the protest march, which was  
252 unusual for such a big event. After the bombing, various interviewees depicted horrific scenes  
253 of blood all across the square and human remains everywhere on the ground, even on the clothes  
254 and hair of survivors.

255 *We already call the bombing there a terrorist state. Apart from that, I think people are being tortured*  
256 *psychologically, because if people are still psychologically unable to come to their senses, if they commit*  
257 *suicide, it means that both forms of torture exist. (TN 17, Pos. 75-76)*

258  
259 *There was always the danger, getting caught... For example... If I were in Türkiye now, I would be caught, I*  
260 *would be put in jail, but no information would be presented anywhere. I mean, the police would say, "this*  
261 *man has done this, he has done that". Therefore, there is already such distrust and psychological pressure*  
262 *on everyone. This is currently being applied. The man can lock up whoever he wants, kill whoever he wants,*  
263 *but there are also these heavy things I mentioned. I grew up with these stories. You can listen to thousands*  
264 *of these stories. (TN 15, Pos. 26)*

265  
266 *Detention and police custody, charges, and prison conditions (126 quotes):* The majority  
267 mentioned that the police had taken them into temporary custody. Indeed, the interviewees  
268 described that so many people were taken to custody that it started to feel almost ordinary to

269 them. In custody, they mentioned different lengths of stay under custody, from several hours to  
270 weeks, during which the prisons offered little space, food or water. Sometimes they weren't  
271 allowed to use the toilet or shower. Some interviewees also felt that wardens deliberately spread  
272 distrust among detainees, used body searches to humiliate them or isolated them completely.  
273 Another participant described complete darkness in isolation and that calls and visits were  
274 prohibited. Under police custody, several interviewees reported that they were not allowed to  
275 contact family and friends, spent hours in painful handcuffs, and that constant intentional  
276 disturbances led to no rest. Some felt that soldiers and police officers tried to humiliate them to  
277 make them feel small and to prove their authority. One described that they were forced to slap  
278 each other in the face. One participant mentioned that she was in an isolation cell for one year.  
279 Another described that there were no beds and people had to sleep on cardboard boxes on the  
280 floor in overcrowded rooms.

281 *We didn't want to give our fingerprints and were discussing it... They said, "Either you give your prints*  
282 *voluntarily or we will take them by breaking your fingers." (TN 1, Pos. 31-34)*

283  
284 *Likewise, you go to the forensic medicine, the doctor there also plays his part in this, even if not directly*  
285 *physically. I mean, you've got bruises all over you, there is blood coming out of your nose, I don't know,*  
286 *some people's eyes are closed, and they can't be opened, but they can give you a healthy report without*  
287 *examining you at all. (TN 7, Pos. 23)*

288  
289 *Violence in the context of conflicts in Kurdish areas (38 quotes):* Several interviewees described  
290 violence in the context of conflicts in the Kurdish areas, especially in violent conflicts and  
291 curfews in Cizre, but also in Nusaybin and Diyarbakir. Participants mentioned bombings and  
292 that civilians were burnt alive. Two interviewees recalled the public campaign and threats  
293 against the "Academics for Freedom", followed by their suspension, as a reaction to their  
294 petition to cease state violence in mainly Kurdish populated areas.

295 *Because what happened was not normal. The bodies were all burnt to ashes, like burning wood. The bodies*  
296 *were unrecognisable now, some of them still could not identify their bodies. Torture, okay, war is war, but*  
297 *war is on the mountain, not in the city. You kill the ones on the mountain, but so much torture, so much*  
298 *burning, so human; I don't know, you can't place it anywhere. (TN 17, Pos. 50)*

299

300 *Violence of civil government supporters* (25 quotes): Participants described right-wing  
301 government supporters set fire to Kurdish stores and entered private homes and pelted them  
302 with stones, sometimes with the support of local police. They stated they were at the mercy of  
303 constant harassment and persecution. One teacher reported that she was accused by families of  
304 her students of spreading Kurdish propaganda in her classes and was therefore threatened via  
305 social media.

306 *I received a message on Facebook saying, "We will wipe the Kurdish race off the face of the earth". A man I*  
307 *don't know personally sent me his genitals, he posted it as a picture, and it was a message like "I will make*  
308 *you moan under me until you say ' How lucky anyone can be who calls himself a Turk'". (TN 13, Pos. 36)*

309 *I am convinced that the physical and psychological pressure outside is also torture, so there is definitely a*  
310 *connection between them. Because that is the perception and the mentality. There is a perception that "you*  
311 *can do whatever you want to those who are not of your kind, you can say whatever you want" and they believe*  
312 *that they are powerful. Of course, they are really powerful because they have the state behind them. That's*  
313 *why it's torture for me. (TN 13, Pos. 51)*

315

316 *Sexualised violence* (13 quotes): Participants, both female and male, described different forms  
317 of sexualised violence. Various participants described that there was constant harassment, even  
318 outside prisons, in contact with police officers and that they were touched inappropriately. One  
319 described specific insults because of her bisexuality, another received explicit pictures of male  
320 genitals and threats about being raped. As one of many torture methods, one male participant  
321 depicted he had to kneel with police officers positioned behind him, threatening to insert an  
322 object into him.

323 *There was sexual harassment at every detention. (TN 10, Pos. 60)*

324

325 *I was afraid that they would rape me, that they would catch me somewhere, that they would do something to*  
326 *me... Because Türkiye is very convenient in this sense. You live alone, you are a single woman, you have*  
327 *been defamed by a very dangerous newspaper, and we know how dangerous their supporters are. (TN 13,*  
328 *Pos. 36)*

329

330 *They wanted to force me to undress for the body search... They didn't manage to do that... But this was a*  
331 *threat, in between they constantly insulted me, like... about my sexual identity, for example... "Let the female*  
332 *police come if you want" and similar disgusting "jokes". (TN 1, Pos. 35)*

333

## 334 **Psychological consequences**

335 Considering that all participants had experienced some form of state repression in Türkiye,  
336 every interviewee described their acute response in a situation of imminent danger, emotional  
337 reactions during and after the events, as well as general long-term consequences.

338 *Acute response* (51 quotes): Most interviewees mentioned some form of emotional or mental  
339 response to imminent danger. Many described being primarily afraid for relatives and friends  
340 who were in a situation of danger with them, but also for those from whom they were separated.  
341 Some reported they tried to stay calm or take the perpetrator's perspective, or to simply find a  
342 way to save themselves and their acquaintances. Many interviewees felt responsible and guilty  
343 that friends were in a difficult situation because of them. One participant stated that he suffered  
344 such agony due to physical violence in prison that he wished for them to kill him right away.  
345 Other participants reported that they did not even believe in survival. Some feared that officials  
346 would make their corpses disappear so that their relatives would never know of their death.  
347 Others described they only wished they would see their families again. Some participants stated  
348 they resisted, others deliberately did not take a defensive position, but pretended to be ignorant  
349 of the accusations. One described compliance to unnecessary police requirements out of fear.

350 *At that moment, I thought they should kill me right away so that I could get out of there... Psychologically, I*  
351 *was convinced that I would never get out of there. He also puts pressure on you by saying "you're here with*  
352 *us for another 14 days "... "You won't get out of here yet"... At that moment you think to yourself, "I might as*  
353 *well get killed now" (TN 4, Pos. 95-96)*

354

355 *In fact, you're not really thinking at that moment. You're just scared. There is fear, yes... There's no need to*  
356 *pretend you were not afraid just to seem brave. You think that everything is over. (...) So in that moment you*  
357 *are scared, in that moment you don't think anything, you don't feel anything. Maybe in a little moment of*



358 *emptiness, you might think a little bit, because you don't have any chance to think... What will you even think*  
359 *about? (TN 10, Pos. 110-111)*

360

361 *Emotional reaction* (in total 236 quotes): Several participants reported emotional difficulties in  
362 association with the torture experienced. Some said they stopped feeling at all, some developed  
363 strength to handle the dangers they were confronted with. The most common themes mentioned  
364 were fear, anger, inner conflicts, powerlessness and hopelessness, sadness and grief, as well as  
365 shame and guilt. Many participants described grief for their losses and overwhelming sadness  
366 since they arrived in Germany. Some participants expressed sadness that they could not witness  
367 important life events, such as weddings or funerals, because they were in Germany. They  
368 pondered with their decision to leave Türkiye because they felt they had abandoned their family  
369 and friends. One participant stressed that he felt guilty that his children had to endure difficulties  
370 because of his decisions.

371 *Everything was meaningless to me now. I couldn't cry, I couldn't laugh, there was such an intermediate tone*  
372 *in my emotions (...) Everything was meaningless now. I started thinking, "After this hour, even if all of*  
373 *Türkiye is liberated, even if this despotism is overthrown, there is no point anymore." Because terrible things*  
374 *had happened. There had been war crimes. (TN 15, Pos. 22)*

375

376 *I feel guilty towards them. Yes, anyone can experience this stress and troubles in our latitudes, but I was*  
377 *fighting for something, for the values I believe in. But I say, "I wish I hadn't included them". I wonder if there*  
378 *was ever a chance to not include them. (TN 16, Pos. 165)*

379

380 *Fear and anxiety* (46 quotes): Almost every participant reported to have experienced some form  
381 of fear because of state repression and torture. Some knew the prison that they were taken to  
382 from stories and were afraid of what would await them there. Once inside, they were afraid to  
383 be called into interrogation, one interviewee said. One participant described hiding his fear so  
384 as not to further frighten other (female) prison inmates. Fear was present in dangerous situations  
385 as when the state of emergency was proclaimed and in everyday life when threats reached them.  
386 Several interviewees highlighted that, eventually, it was the most prominent motivation for the  
387 flight to Germany. Some described inner unrest when they spot police officers even today.

388 Others experienced panic attacks and where overwhelmed by fear when something reminded  
389 them of their frightful experiences.

390 *And we were all afraid that... Little did we know that it would be just those two suicide bombings. I was sure*  
391 *I was going to die that day. I was sure of it. (TN 11, pos. 26)*

392  
393 *I was always anxious, to be honest. Unfortunately, there was a period when I had to constantly look to the*  
394 *right and to the left because something would happen at any moment, something would come out of*  
395 *somewhere. (TN13, Pos.43)*

396  
397 *Anger and Impulsivity (33 quotes):* Many participants described that they showed higher levels  
398 of impulsivity and aggression since the events. Some hoped for revenge and demanded  
399 accountability, for several interviewees anger was a driver of motivation and hope. Others  
400 described that the injustices they had observed created a need to shout and express anger. Some  
401 said they did not express the anger, however, or directed it against themselves.

402 *For a while I was very angry, then that anger turned into sentimentality, then for a while I was unable to feel*  
403 *anything towards anyone or anything, including my parents. Now, I don't know if it's because of those*  
404 *periods, but for example, I'm a person who gets angry very quickly, who has an immediate outburst of anger,*  
405 *but I'm also extremely emotional. (TN 6, Pos. 101)*

406  
407 *I mean, I had an extreme anger, and after a while that anger scabbed over. It wasn't a very painful anger*  
408 *anymore; it was something else. Nothing made sense anymore. (TN 15, Pos. 22)*

409  
410 *Powerlessness and Hopelessness (24 quotes):* Some interviewees described that they were not  
411 able to process what was happening around them in dangerous situations, so they froze and  
412 could not react. Several participants experienced major hopelessness, or they felt despair like  
413 they were at a dead end. Some accused the European Union of not intervening.

414 *So, we waited, then we looked, there were some friends on the ground, some of them were injured, some of*  
415 *them were dead, these two friends... We didn't do anything, to be honest... I mean, I couldn't react... Because*  
416 *I didn't fully understand what was happening... (TN 3, Pos. 97)*

417  
418 *I remember during that time, from August onwards, when in Sur and Diyarbakir, in Ahmet, many people*  
419 *were... were killed. I remember that, I am not exaggerating, I had to cry every night. Always in my bed. I*  
420 *cried, cried, cried, I felt powerless. I thought to myself, it's not possible, I can't go on like this under these*  
421 *conditions. (TN 11, pos. 24)*

422  
423 *Now, people generally have good intentions and most of the society in Europe understands us. Not all people*  
424 *think evil, but the state is a different organism and all the states in Europe know very well what is going on,*  
425 *but they remain silent. They continue to trade with Türkiye, they continue to sell arms, they continue to*  
426 *support Erdogan financially. Because Europeans think very analytically, the states. So, if Türkiye*  
427 *experiences a serious chaos, refugees will start coming in a different way. Türkiye is currently a member of*  
428 *NATO. If it withdraws from it and turns towards Russia, the calculations of Europe and America will be*  
429 *mixed up. So, analytical in that sense. (TN 15, Pos. 24)*

430  
431 *Courage and strength* (67 quotes): Numerous participants expressed that they had shown  
432 strength in moments of great danger. They had resisted provocations of police officers and kept  
433 calm to avoid greater difficulties. Some stated that their will to survive grew when they hit rock  
434 bottom and suffered from the deepest pain. Many interviewees stated they told themselves to  
435 be strong and brave because others would be worse off. One participant vigorously sought  
436 international courts to work for a just verdict regarding the events in Türkiye. His way to  
437 maintain strength, he said, was to always seek purpose. Many described that they wanted to  
438 stay in place to resist, but in the end, it had not been possible, so they fled to Germany.

439 *And this loud noise, they are trying to drive you mad, they are brainwashing you. At that time, as one of the*  
440 *psychological resistances, I created a resistance by directing my mind to other things that I could occupy*  
441 *myself with, creating a little world in my head, in my mind, in that noise. (TN 21, Pos. 35)*

442  
443 *But after a while, the fear is gone... Courage replaces fear... I guess that's what you think... "I have to take*  
444 *precautions myself... What else can he do... The most he can do is kill... He's doing what he's going to do,*  
445 *what else is left?" (TN 4, Pos. 96)*

446  
447 *When I saw that I was still alive after the fall, I realised that they hadn't thrown me out of the window. Do*  
448 *people still want to live after all they have been through? I did. (TN 10, Pos. 62)*

449  
450 *Think of it this way, our aim was to make our voices heard even in the furthest corners of the prison, so that*  
451 *we can communicate what is happening to the outside or to different places, it also removes some of the*  
452 *weight of the attack. And then you shout your slogans and experience torture. (TN 14, Pos. 40)*

453  
454 *Long-term consequences* (in total 212 quotes): The interviewees reported different aspects of  
455 long-term psychological and psychosomatic consequences of their aversive experiences in  
456 Türkiye. This included a lack of trust as well as a sense of injustice. Several participants

457 described stress symptoms, exhaustion, heaviness, listlessness, and rumination or inner tension.  
458 Some participants said they used cigarettes to calm themselves after arousal, some mentioned  
459 suicidal thoughts. Most interviewees stated that they experienced memory lapses and  
460 difficulties in concentrating, or other psychosomatic complaints, such as fatigue and headaches.  
461 Many reported loss of appetite and weight loss, insomnia, nightmares and problems sleeping  
462 through the night. One participant described facial and body rashes due to psychosomatic stress.  
463 Another participant mentioned frequent nausea and dizziness since the imprisonment and  
464 another interviewee severe back pain and a herniated disk.

465 *I guess I must have been a little bit nervous... I've been distracted... I'm having troubles concentrating on*  
466 *anything... And the feeling of tiredness... (TN 4, Pos. 108)*

467  
468 *I get angry all of a sudden. I have sudden crying fits. I mean, the slightest, the smallest thing can remind me*  
469 *of the past even if I'm laughing normally, at that moment I can immediately break away from that environment*  
470 *and go there. I can't help it; I can't stop it.*

471 *Sometimes my brain stops, I can't think of anything. I'm in such a void, I force myself, I force myself, I force*  
472 *myself, I force myself, I force myself, I can't think of anything. That moment ends there. (TN 10, Pos. 166-*  
473 *167)*

474  
475 *I cannot imagine any positive dreams. For example, let's say I go from here to the centre, I cannot dream of*  
476 *happiness, I say to myself 'the opposite will happen'. I feel anxious, as if the good things I want to do will*  
477 *always be the opposite. (TN 16, Pos. 166-168)*

478  
479 *Hypervigilance and lack of trust (46 quotes):* Several interviewees reported that most often,  
480 they checked their surroundings for any possible threat and that they were alarmed when they  
481 spotted police officers, also outside of Türkiye. Some participants stated they avoided social  
482 contacts in Türkiye and no longer trusted anyone.

483 *It's a very basic feeling of insecurity. For example, before I used to go to bed without closing my curtains,*  
484 *but after this incident I felt like someone was watching me all the time, and so you can't be comfortable at*  
485 *all... At first, I was very anxious, and I had to constantly check everything left and right. (TN 1, Pos. 94)*

486  
487 *Sensitivity to sudden noises, if this glass falls down, for example. Anxiety about radio noise, sudden noises*  
488 *at night or if someone wakes me up suddenly. (...) I mean, I am in a state of panic, I am in a constant state of*  
489 *alertness. (TN 2, Pos. 73)*

490

491 *I didn't trust anyone, to be honest... Until I left Türkiye... (TN 21, Pos. 45)*

492

493 *Isolation, loneliness, and silence* (25 quotes): Many reported that in order to protect themselves  
494 or others from bad emotions and pain, they did not talk about their experiences state repression  
495 and torture. They said their relatives received only rough information about their detention and  
496 injuries.

497 *I don't talk to anyone so that I don't make others feel bad, so that I don't make them feel bad. (TN 12, Pos.*  
498 *91)*

499  
500 *So, I experienced the same stress at home, so I went into a room and closed the door so as not to hurt my*  
501 *children, so as not to upset them. This situation made me more and more isolated. (TN 16, Pos. 154)*

502

503 *Suppressing feelings and forgetting* (43 quotes): Some participants described they avoided to  
504 think about their aversive experiences, others mentioned they blocked out the news that could  
505 remind them of it. Some forgot parts of the torture experience or other abuses.

506 *Because of all this, I always want to escape from myself, I always want to run away from myself. Let me stay*  
507 *away from these problems, from these issues. (TN 16, Pos. 170)*

508

509 *Because people protect themselves and they do things. For example, as if it never happened, you freeze things*  
510 *that cause you severe trauma, as if it never happened, as if it hurts you so much that you freeze it and put it*  
511 *in the closet, as if it never happened. And after a while you start to believe it. (TN 20, Pos. 14)*

512

## 513 **Current Situation**

514 *Political Conviction and Religious Belief* (64 quotes): Most interviewees stated that their  
515 political or religious conviction helped them to overcome the aversive experiences they had and  
516 to move on. Many described that they were prepared by the stories of other political activists,  
517 which made it easier for them to process the events. It served as a resource to classify and  
518 process what had happened and to demand justice.

519 *Our experiences became heavier with every second. That, of course, because of our political beliefs, and the*  
520 *work we did. But because we did it in full awareness of the consequences, we could be a little bit more*  
521 *prepared, (...) knowing that there might be problems. And at the same time, I can cope a little bit more myself*  
522 *because I see and I know that I am not the only one who has experienced it and that there are others who*

523 *have experienced it more severely. I mean, there are others who have been through it worse, and if they have*  
524 *been able to get through it, you can get through it too, or we can get through it all together. (TN 2, Pos. 101)*

525  
526 *Actually, it is not us who are dishonoured... Those who let us experience this degrading treatment should*  
527 *also be the ones whose dignity is taken away... How can they look their children in the eyes? Actually, when*  
528 *you think about it, they are the ones who are dishonoured... (TN 14, Pos. 75)*

529  
530 *Psychologically I think these feelings help me. Let me put it this way, for example: if you ask me "do you*  
531 *regret it", I don't regret it at all. Even if the same thing happened to me again, I think that in principle,*  
532 *ethically, as a human being, if I am doing something for humanity, I should go on doing it. (TN 21, Pos. 51)*

533  
534  
535 *Subjective well-being, work and social activities (74 quotes): Many participants noticed*

536 *performance impairments in themselves that they related to their experiences with torture. and*  
537 *criticised their general state of health. Most participants reported they had no regular daily*  
538 *structure, especially those who lived in a refugee camp with an insecure asylum status. Several*  
539 *participants hoped to find work or their own apartment soon but said that this was more*  
540 *complicated due to the Covid-19 pandemic. In general, interviewees were socially integrated*  
541 *in Turkish communities and mentioned friends in Germany. Many reported taking care of*  
542 *themselves by going for walks, listening to music or reading books and watching videos but*  
543 *some felt they didn't have the strength to do so at the moment.*

544 *Sometimes I still feel like I'm watching a movie when I'm walking around in Germany, in the woods, at the*  
545 *lake, etc... Is it real or is it just another dream? Because I dreamt every day for a year. Every day I dreamt*  
546 *that I was leaving the country to start a new life with my family abroad. (...) So now I feel like I'm dreaming*  
547 *again. (TN 22, Pos. 48)*

548  
549 *I go for walks regularly, I try to eat, but no matter how much I do, this life in the refugee accommodation*  
550 *always stops me from doing something and I stay there. That's why I don't do anything. (TN 8, Pos. 178)*

551  
552 *What's happened has already happened. You don't see it as if nothing happened, but at least you can take a*  
553 *deep breath. But something is still squeezing my heart. You breathe, but your chest isn't full. (...) There's*  
554 *something missing. (TN 15, Pos. 24)*

555  
556 *Plans for the Future (34 quotes): About half of the interviewees felt optimistic about their*  
557 *future. Others expressed doubt about their general situation in Germany and whether they could*

558 achieve their goals. One participant said that he no longer made long-term plans, because all  
559 his plans had been interrupted when he had to flee Türkiye and he feared this to happen once  
560 again when the authorities cancelled his residence permit.

561 *Generally, I feel that my motivation to live has dropped a lot. Waking up in the morning, facing the day,*  
562 *experiencing the excitement of the day are things that I haven't felt for a long time, ever since I came here...*  
563 *(TN 18, Pos. 107)*

564  
565 *What we're going to do here will always refer to there. That's what will always remain unresolved in my*  
566 *heart as long as I can't go back to Türkiye. Running down the street with the camera in my hand. Because*  
567 *that's what I want, because that's what I did, because that's what I learned... So, on the one hand we were*  
568 *the ones who experienced the torture, but on the other hand we were also the ones who somehow documented*  
569 *it. (TN 2, Pos. 141)*

570

## 571 **Discussion**

572 Torture is a profound public health concern because it seeks to undermine not only the physical  
573 and emotional well-being of individuals but also the coherence of entire communities. In this  
574 regard, the use of torture and other degrading treatment as state repression is a method to  
575 weaken a whole subpopulation. In this unique research project, we documented the emotional  
576 and physical reactions of survivors of torture and state repression that fled to Germany to seek  
577 asylum.

578 To our knowledge, only one phenomenological study focused on posttraumatic growth in  
579 witnesses to the coup attempt exists so far (29), and ours is the first study to depict the human  
580 rights violations experienced by various Turkish citizens. No other study has interviewed  
581 politically or religiously active Kurdish or otherwise threatened Turkish citizens about their  
582 experience during the period of 2015 – 2018 before. The reports of twenty asylum-seekers from  
583 Türkiye transmit a portrait of a suppressive state that uses illicit means to silence human rights  
584 activists and political opponents. The methods described by various interviewees are consistent  
585 with similar reports from the last decades about the use of unlawful treatment of dissidents,

586 especially Kurds (4,8,11). The depicted strategies to humiliate detainees were diverse and  
587 spanned from threats to unjustified dominant behaviour under police custody to electric shocks.  
588 In the descriptions of violence from state officers and the seemingly flawed system of routine  
589 medical controls, a power imbalance is clearly perceptible.

590 The fear and hypervigilance described by several participants appears to reach such levels that  
591 some suffer from PTSD, anxiety disorder, or panic disorder in the aftermath of the events. Some  
592 saw this as a contrast to the confident and self-righteous demeanour of members and supporters  
593 of the government. Several participants described symptoms of depression, like heaviness and  
594 rumination, and some describe suicidal thoughts. This is an alarming sign for the mental health  
595 burden that is caused by state repression and torture. In light of our study, the need for more  
596 efforts to support refugees that have experienced extreme violence is evident.

597 The overall health of the interviewees seemed to be severely threatened after their experiences  
598 of torture and state repression. Some participants displayed signs of addiction from cigarettes  
599 as a form of self-medication to calm themselves, others suppressed their emotions or isolated  
600 themselves from family and friends. In the face of the experiences as well as the flight to  
601 Germany, immense exhaustion became apparent. The months of inner tension had left their  
602 marks on most interviewees. For many, political and religious beliefs were of great importance.  
603 They found comfort in the fact that their relatives and peers had already experienced  
604 imprisonment and police custody and the support they received by them. This way, they felt a  
605 sense of unity and purpose despite the violence that was inflicted on them. Their recovery was  
606 often limited by the current living situation under Covid-19, their insecure asylum status, and  
607 conditions in refugee camps. Most of them were socially integrated in Turkish communities in  
608 Germany.

609

## 610 **Limitations**



611 First of all, the presented experiences of torture and state violence are derived from individual  
612 narratives and reflect the interviewees' opinion only. Due to our qualitative approach, this study  
613 includes only a small number of participants and is far from representative. Nevertheless, we  
614 managed to interview Turkish citizens from various groups as Kurds, Alevis, and supporters of  
615 the Gülen movement.

616 When we conducted the first interviews, we realised that not all interviewees had been  
617 imprisoned, as formerly expected, but still every interviewee had experienced aversive and  
618 degrading treatment in Türkiye. All of them identified as survivors of torture, defined by them  
619 as illicit actions by the state against individuals or groups of people. It is debatable whether  
620 these events meet the official definition of torture, given the severity of the pain and suffering  
621 apparent in the reports and the clear connection to political activities. Moreover, following the  
622 Istanbul Protocol on the documentation of torture and other cruel, inhuman, or degrading  
623 treatment, the victim perspective is considered to be crucial in the evaluation of aversive  
624 experiences (1). This topic remains open for discussion.

625

## 626 **Conclusion**

627 This study is an important contemporary testimony of a relevant period in Turkish history. The  
628 collected reports of torture and state repression and its psychological impact send an alarming  
629 sign for policy makers to address the prevention of human rights violations and the support  
630 needs of survivors.

631

632

## 633 **Acknowledgments**

634 *Author Contributions:* CN, ET, IS, and KY conceived and participated in the design of the  
635 study. ET and IS carried out the study. CN and KY supervised the project. IS transcribed and

636 translated the interviews and ET carried out the descriptive analysis. ET and CN finally drafted  
637 the manuscript. CN, ET, H-CF, IS, and KY revised the manuscript. All authors approved the  
638 final manuscript.

639 *Conflicts of Interest:* The authors declare no conflict of interest.

640

## 641 **References**

- 642 1. United Nations. Istanbul protocol: manual on the effective investigation and documentation  
643 of torture and other cruel, inhuman or degrading treatment or punishment. Rev. 2. New  
644 York, N.Y. Geneva: United Nations; 2022. 212 p. (Professional training series / Office of  
645 the United Nations High Commissioner for Human Rights).
- 646 2. United Nations. United Nations Treaty Collection [Internet]. Treaty Series, vol. 1465, p.  
647 85. 2023 [cited 2023 Jun 26]. Available from:  
648 [https://treaties.un.org/Pages/ViewDetails.aspx?src=TREATY&mtdsg\\_no=IV-](https://treaties.un.org/Pages/ViewDetails.aspx?src=TREATY&mtdsg_no=IV-9&chapter=4&clang=_en)  
649 [9&chapter=4&clang=\\_en](https://treaties.un.org/Pages/ViewDetails.aspx?src=TREATY&mtdsg_no=IV-9&chapter=4&clang=_en)
- 650 3. Merkel W, Kollmorgen R, Wagener HJ, editors. The Handbook of Political, Social, and  
651 Economic Transformation [Internet]. 1st ed. Oxford University Press; 2019 [cited 2023 Sep  
652 15]. Available from: <https://academic.oup.com/book/7722>
- 653 4. Bradley L, Tawfiq N. The physical and psychological effects of torture in Kurds seeking  
654 asylum in the United Kingdom. 2006;16(1):7.
- 655 5. Abu Suhaiban H, Grasser LR, Javanbakht A. Mental Health of Refugees and Torture  
656 Survivors: A Critical Review of Prevalence, Predictors, and Integrated Care. Int J Environ  
657 Res Public Health. 2019 Jul;16(13):2309.
- 658 6. Thomsen AB, Eriksen J, Smidt-Nielsen K. Chronic pain in torture survivors. Forensic Sci  
659 Int. 2000 Feb 28;108(3):155–63.
- 660 7. Başoğlu M, Paker M, Paker Ö, Ozmen E, Marks I, Incesu C, et al. Psychological effects of  
661 torture: A comparison of tortured with nontortured political activists in Turkey. Am J  
662 Psychiatry. 1994 Feb 1;151:76–81.
- 663 8. Council of Europe. REPORT TO THE TURKISH GOVERNMENT ON THE VISIT TO  
664 TURKEY CARRIED OUT BY THE EUROPEAN COMMITTEE FOR THE  
665 PREVENTION OF TORTURE AND INHUMAN OR DEGRADING TREATMENT OR  
666 PUNISHMENT (CPT) FROM 10 TO 23 MAY 2017 [Internet]. CPT/Inf (2020) 22; 2020  
667 [cited 2023 Sep 15]. Available from: <https://hudoc.cpt.coe.int/eng/?i=p-tur-20170510-en>
- 668 9. UN Committee Against Torture. Concluding observations on the fourth periodic reports of  
669 Turkey [Internet]. 2016. Available from: <https://www.refworld.org/docid/57a98fe64.html>

- 670 10. Human Rights Watch. Turkey: Events of 2021. In: World Report 2022 [Internet]. 2021  
671 [cited 2022 Aug 26]. Available from: [https://www.hrw.org/world-report/2022/country-](https://www.hrw.org/world-report/2022/country-chapters/turkey)  
672 [chapters/turkey](https://www.hrw.org/world-report/2022/country-chapters/turkey)
- 673 11. Melzer N. Statement by Mr. Nils Melzer: Special rapporteur on torture and other cruel,  
674 inhuman or degrading treatment or punishment. 37th session of the Human Rights Council  
675 [Internet]. Office of the High Commissioner on Human Rights.; 2018. Available from:  
676 [https://www.ohchr.org/Documents/Issues/SRTorture/Statement\\_HRC37\\_SR\\_TORTURE.](https://www.ohchr.org/Documents/Issues/SRTorture/Statement_HRC37_SR_TORTURE.pdf)  
677 [pdf](https://www.ohchr.org/Documents/Issues/SRTorture/Statement_HRC37_SR_TORTURE.pdf)
- 678 12. Council of Europe. Report to the Turkish Government on the visit to Turkey carried out by  
679 the European Committee for the Prevention of Torture and Inhuman or Degrading  
680 Treatment or Punishment (CPT) from 28 to 29 April 2016 [Internet]. CPT/Inf (2018) 11;  
681 2018 [cited 2023 Sep 15]. Available from: <https://rm.coe.int/168079457a>
- 682 13. Can B. Human Rights, Humanitarianism, and State Violence: Medical Documentation of  
683 Torture in Turkey. *Med Anthropol Q.* 2016;30(3):342–58.
- 684 14. Moisander PA, Edston E. Torture and its sequel—a comparison between victims from six  
685 countries. *Forensic Sci Int.* 2003 Nov;137(2–3):133–40.
- 686 15. Whitman L. *The Kurds of Turkey: killings, disappearances and torture.* New York: Helsinki  
687 Watch; 1993. 59 p.
- 688 16. Nisa Sarac B. How state-led political violence affects women: Turkey post the 2016 coup  
689 attempt [Internet]. Women, Peace and Security. London School of Economics and Political  
690 Science; 2021 [cited 2022 Aug 19]. Available from: <https://blogs.lse.ac.uk/wps/>
- 691 17. Duzgun M. Turkey: a history of sexual violence. *The Guardian* [Internet]. 2013 Jun 10  
692 [cited 2022 Aug 19]; Available from: [https://www.theguardian.com/global-development-](https://www.theguardian.com/global-development-professionals-network/2013/jun/10/turkey-history-sexual-violence)  
693 [professionals-network/2013/jun/10/turkey-history-sexual-violence](https://www.theguardian.com/global-development-professionals-network/2013/jun/10/turkey-history-sexual-violence)
- 694 18. Aydin H, Avincan K. Intellectual crimes and serious violation of human rights in Turkey:  
695 a narrative inquiry. *Int J Hum Rights.* 2020 Sep 13;24(8):1127–55.
- 696 19. Baser B, Akgönül S, Öztürk AE. “Academics for Peace” in Turkey: a case of criminalising  
697 dissent and critical thought via counterterrorism policy. *Crit Stud Terror.* 2017 May  
698 4;10(2):274–96.
- 699 20. Deutsche Welle. Turkey’s post-coup brain drain | DW | 22.11.2016 [Internet]. DW.COM.  
700 [cited 2022 Aug 24]. Available from: [https://www.dw.com/en/turkeys-post-coup-brain-](https://www.dw.com/en/turkeys-post-coup-brain-drain/a-36482586)  
701 [drain/a-36482586](https://www.dw.com/en/turkeys-post-coup-brain-drain/a-36482586)
- 702 21. International Crisis Group. A Timeline of ISIS Attacks in Turkey and Corresponding Court  
703 Cases [Internet]. 2020 [cited 2023 Aug 2]. Available from:  
704 <https://www.crisisgroup.org/timeline-isis-attacks-turkey-and-corresponding-court-cases>
- 705 22. European Commission. Key findings of the 2016 Report on Turkey [Internet]. European  
706 Commission - European Commission. [cited 2023 Aug 2]. Available from:  
707 [https://ec.europa.eu/commission/presscorner/detail/en/MEMO\\_16\\_3639](https://ec.europa.eu/commission/presscorner/detail/en/MEMO_16_3639)

- 708 23. Reuters. Turkish court jails hundreds for life over 2016 coup attempt. The Guardian  
709 [Internet]. 2020 Nov 26 [cited 2023 Aug 3]; Available from:  
710 [https://www.theguardian.com/world/2020/nov/26/turkish-court-jails-hundreds-life-2016-](https://www.theguardian.com/world/2020/nov/26/turkish-court-jails-hundreds-life-2016-coup-attempt)  
711 [coup-attempt](https://www.theguardian.com/world/2020/nov/26/turkish-court-jails-hundreds-life-2016-coup-attempt)
- 712 24. Bundesamt für Migration und Flüchtlinge (BAMF). Das Bundesamt in Zahlen 2022 –  
713 Modul Asyl. 2023 [cited 2023 Sep 18]; Available from:  
714 [https://www.bamf.de/SharedDocs/Anlagen/DE/Statistik/BundesamtinZahlen/bundesamt-](https://www.bamf.de/SharedDocs/Anlagen/DE/Statistik/BundesamtinZahlen/bundesamt-in-zahlen-2022-asyl.pdf?__blob=publicationFile&v=9)  
715 [in-zahlen-2022-asyl.pdf?\\_\\_blob=publicationFile&v=9](https://www.bamf.de/SharedDocs/Anlagen/DE/Statistik/BundesamtinZahlen/bundesamt-in-zahlen-2022-asyl.pdf?__blob=publicationFile&v=9)
- 716 25. Mollica RF, Caspi-Yavin Y, Bollini P, Truong T, Tor S, Lavelle J. The Harvard Trauma  
717 Questionnaire: Validating a Cross-Cultural Instrument for Measuring Torture, Trauma, and  
718 Posttraumatic Stress Disorder in Indochinese Refugees. *J Nerv Ment Dis*. 1992  
719 Feb;180(2):111.
- 720 26. Microsoft Corporation. Microsoft Excel [Internet]. 2023. Available from:  
721 <https://office.microsoft.com/excel>
- 722 27. VERBI Software. MAXQDA 2022 [computer software] [Internet]. Berlin, Germany; 2022.  
723 Available from: [www.maxqda.com](http://www.maxqda.com)
- 724 28. Mayring P. *Qualitative Inhaltsanalyse: Grundlagen und Techniken*. 13., überarbeitete  
725 Auflage. Weinheim, Basel: Beltz; 2022. 148 p.
- 726 29. Simsir Z, Dilmac B. Experiences of Posttraumatic Growth in Witnesses to the July 15 Coup  
727 Attempt in Turkey. *Illn Crisis Loss*. 2021 Jul 1;29(3):220–40.

728

## 729 **Supporting Information**

730 **S1 File. Quotes in the original language Turkish in order of appearance.**
